# Supplementary material for: Antitumour activity of the recombination polypeptide GST-NT21MP is mediated by inhibition of CXCR4 pathway in breast cancer
Source: PubMed Central journal article supplement — Br J Cancer. 2014 Jan 21;110(5):1288–97. doi: 10.1038/bjc.2014.1 (PMC3950870; doi:10.1038/bjc.2014.1), 2014-01-21
Supplement: bjc20141x1.pdf [file bjc20141x1.pdf]

**MCF-7**

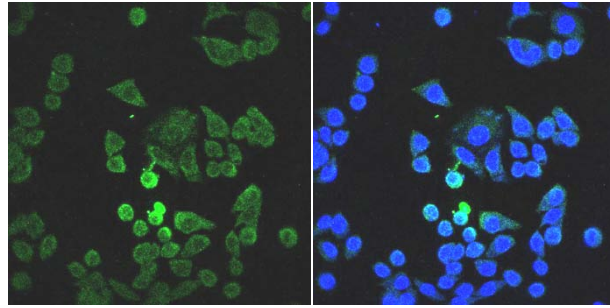

**SKBR3**

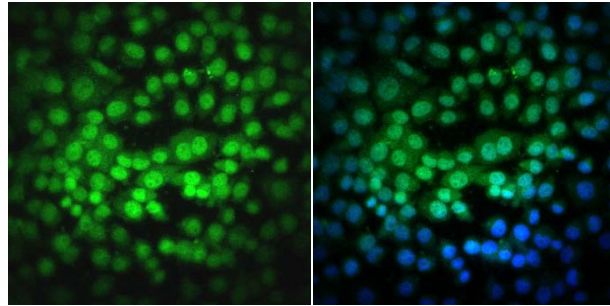

**4T-1**

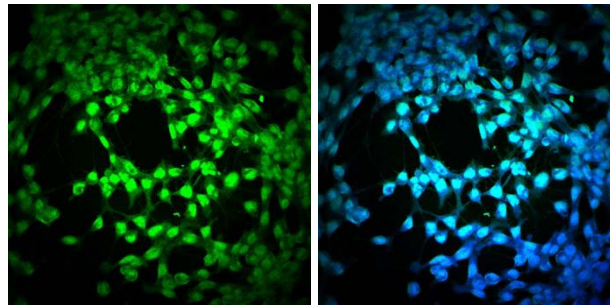

**Supplementary Figure 1: The expression of CXCR4 in three breast cancer cell lines.** CXCR4 expression in different human breast cancer cells. Immunostaining of CXCR4 in MCF-7, SKBR-3 and 4T-1 cells observed by confocal microscopy. Fixed and permeabilized staining with anti-human CXCR4 antibody is shown in green. Nuclei stained with hoechest are shown in blue.

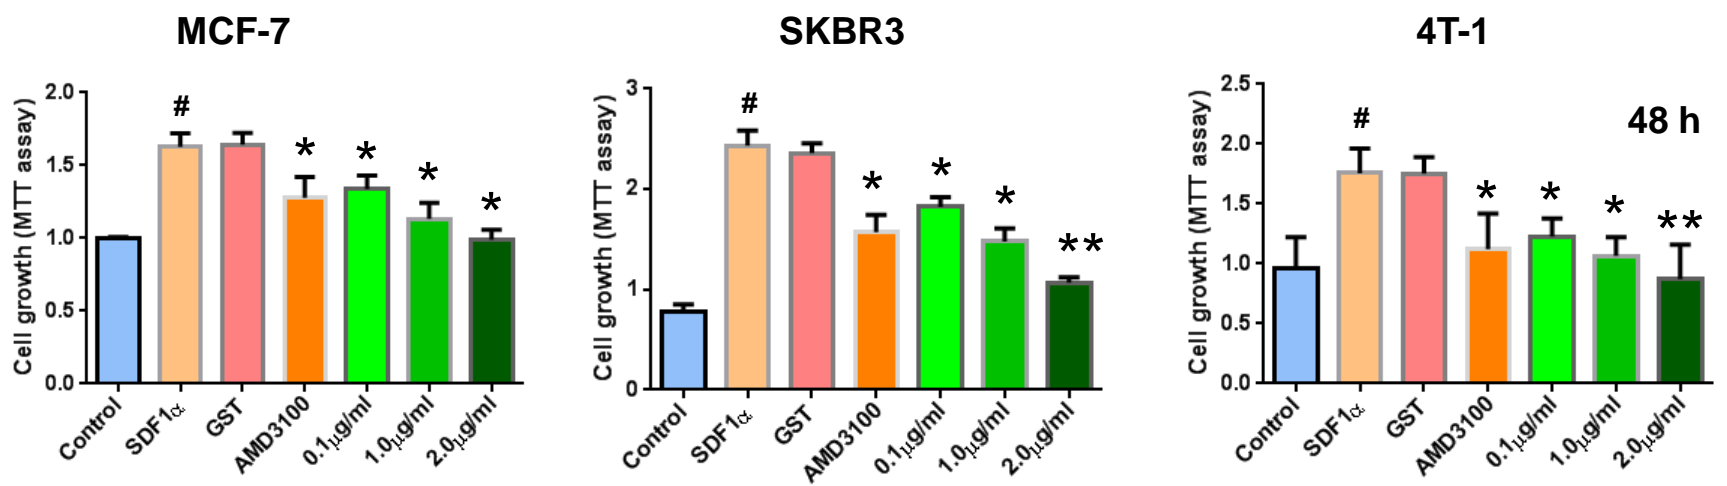

**Supplementary Figure 2: GST-NT21MP inhibited cell proliferation in breast cancer cells.** 0.1mg/ml: GST-NT21MP 0.1mg/ml; 1.0mg/ml: GST-NT21MP 1.0mg/ml; 2.0mg/ml: GST-NT21MP 2.0mg/ml. The effect of GST-NT21MP on the cell viability for 48 h was determined by the MTT assay. #P<0.05, compared to control; \*P < 0.05, \*\*P < 0.01, compared to the SDF1 $\alpha$  treatment.

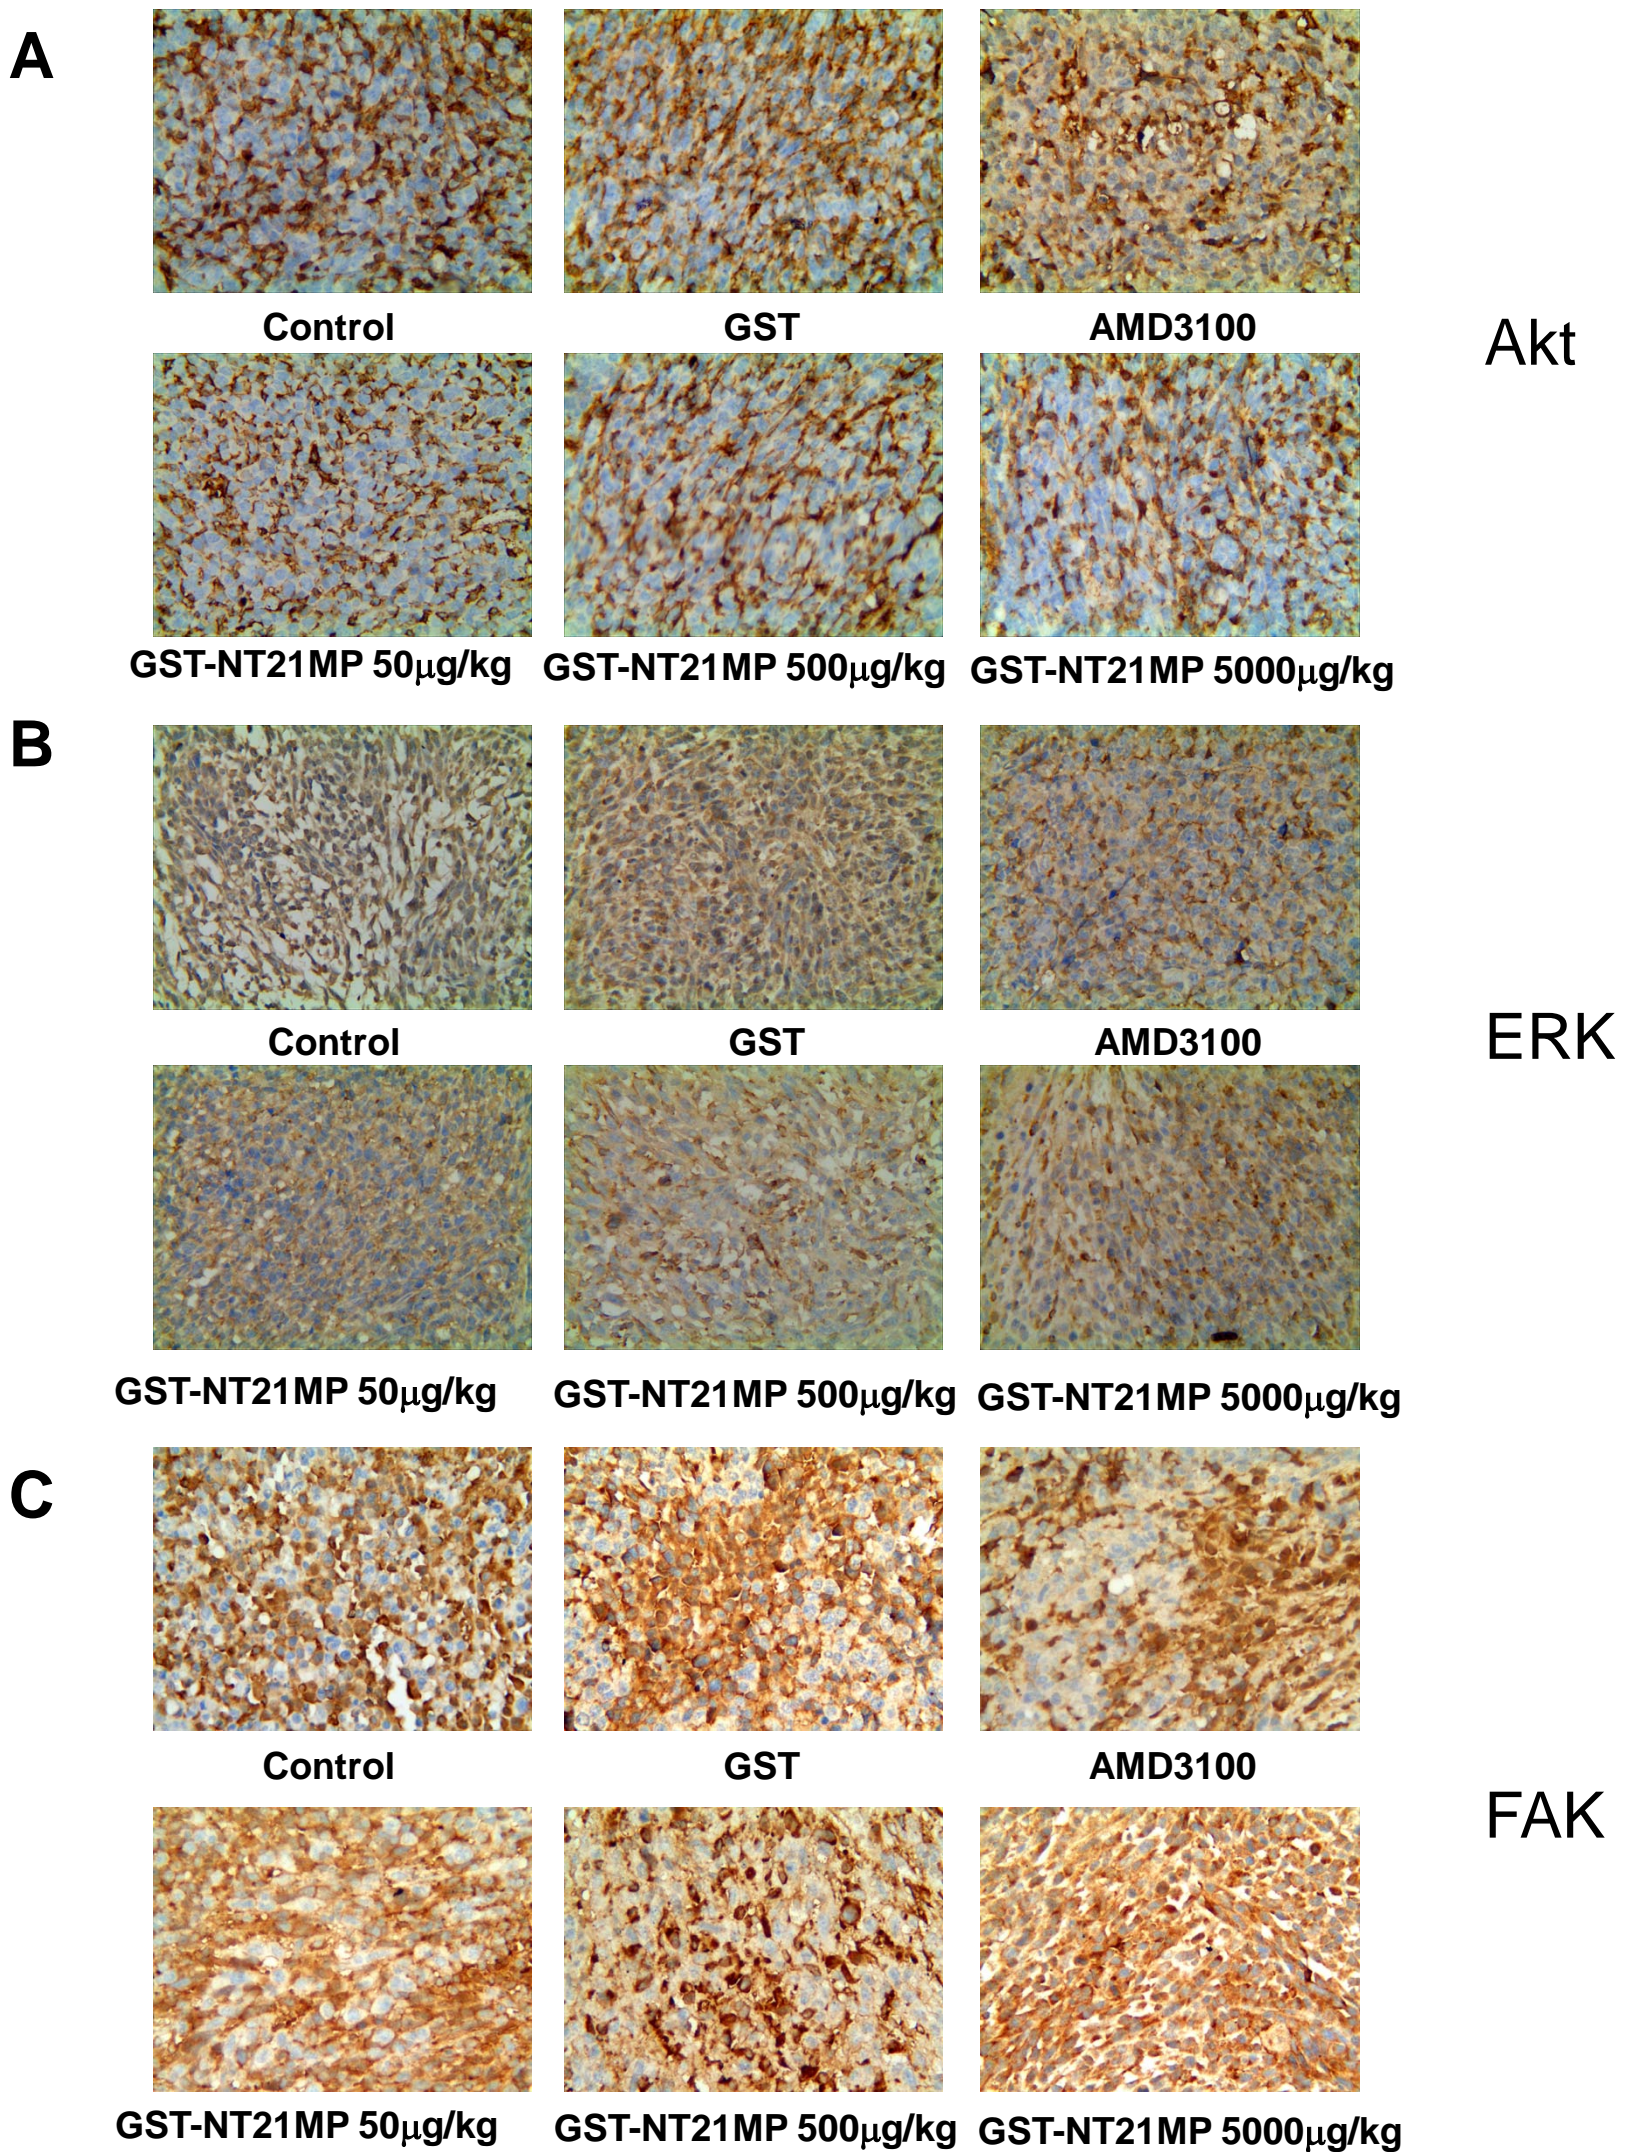

Supplementary Figure 3: Immunohistochemical staining of tumor tissue sections with antibodies to Akt, ERK, FAK.
